# Supplementary material
Source: Springer Nature journal article supplement (https://www.springermedizin.de/resource/supplementary/12911_2012_570_MOESM1_ESM.pdf/9525906)

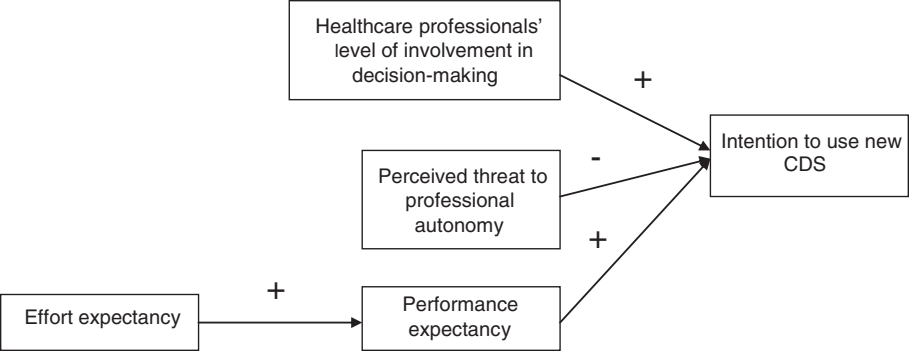

Supplement: MOESM1 [file 9525906]
